# Supplementary material for: Anti-PD-1/PD-L1 antibodies versus docetaxel in patients with previously treated non-small-cell lung cancer
Source: PubMed Central journal article supplement (PMC5800935; doi:10.18632/oncotarget.23584), 2017-12-21
Supplement: oncotarget-09-7672-s001.pdf [file oncotarget-09-7672-s001.pdf]

# Anti-PD-1/PD-L1 antibodies versus docetaxel in patients with previously treated non-small-cell lung cancer

## SUPPLEMENTARY MATERIALS

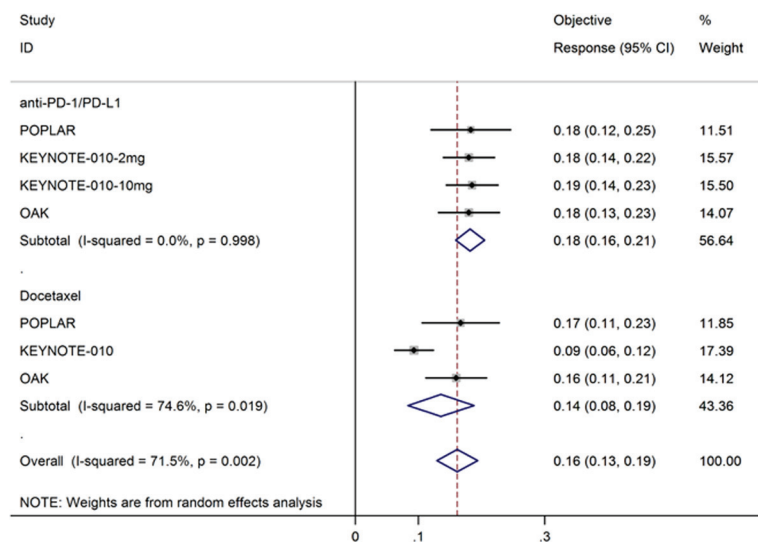

Supplementary Figure 1: Pooled estimates of OR rates for anti-PD-1/PD-L1 antibodies and docetaxel in patients with PD-L1 expression  $\geq 1\%$ .

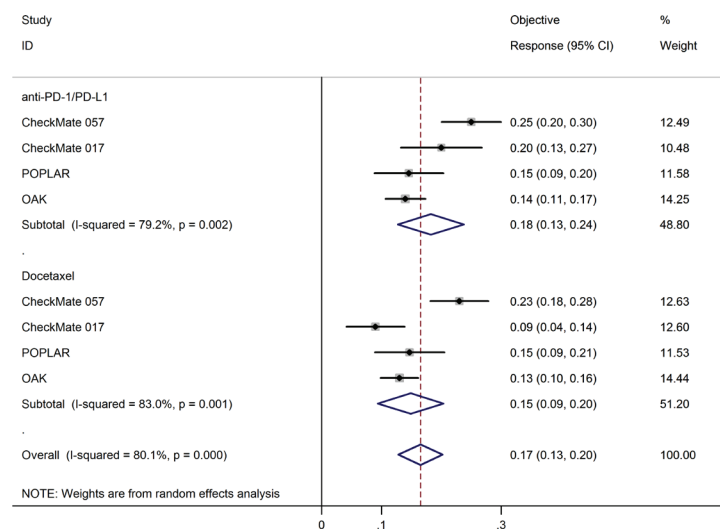

Supplementary Figure 2: Pooled estimates of OR rates for anti-PD-1/PD-L1 antibodies and docetaxel in patients with no limited PD-L1 expression.

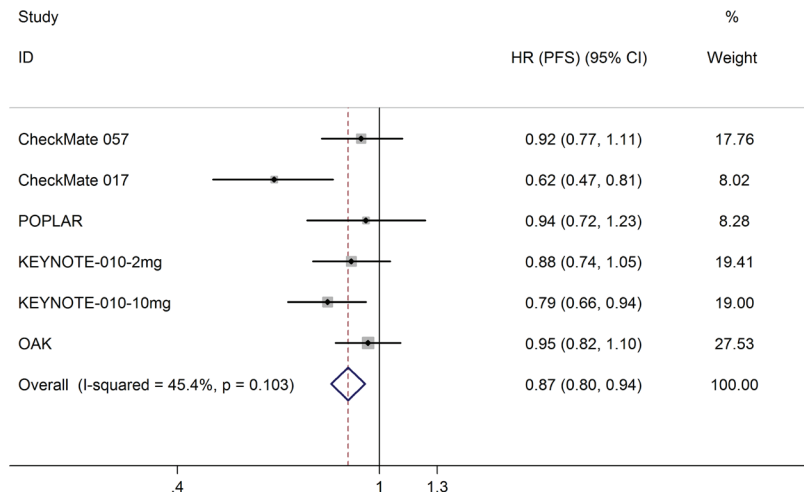

Supplementary Figure 3: Meta-analysis of PFS.

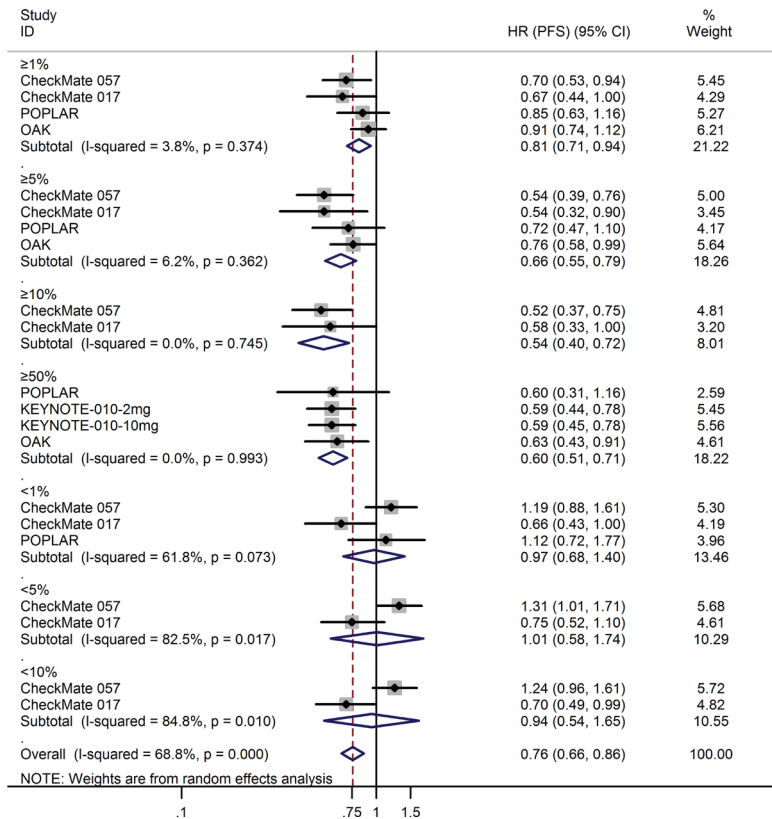

Supplementary Figure 4: Meta-analysis of PFS in patients with 1%, 5%, 10%, and 50% PD-L1 expression.

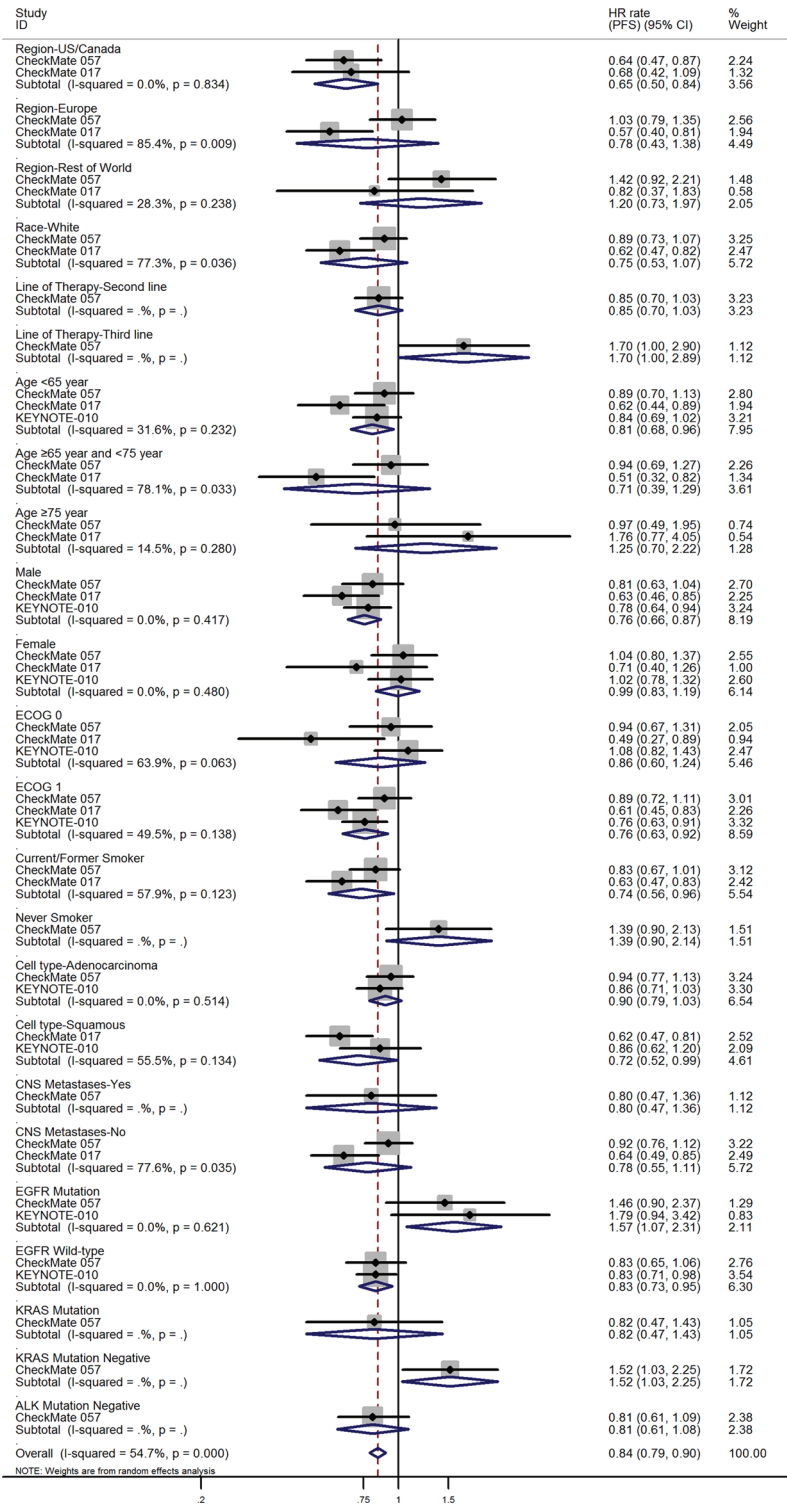

Supplementary Figure 5: Subgroup analyses of the associations between PFS and patient features.

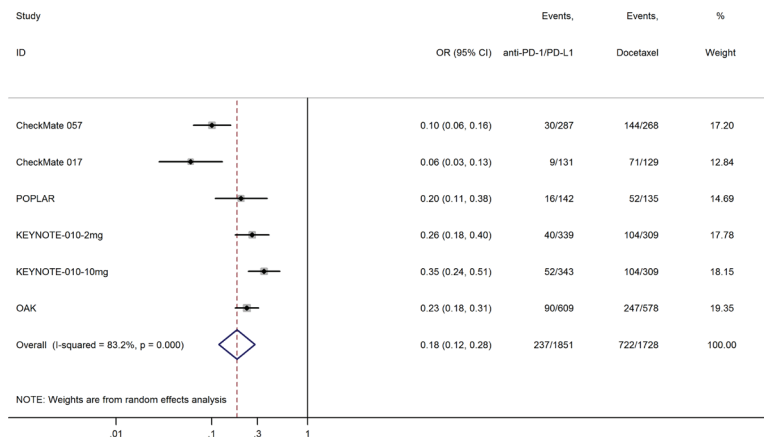

**Supplementary Figure 6: Meta-analysis of grade 3 or 4 drug-related adverse events rates.**

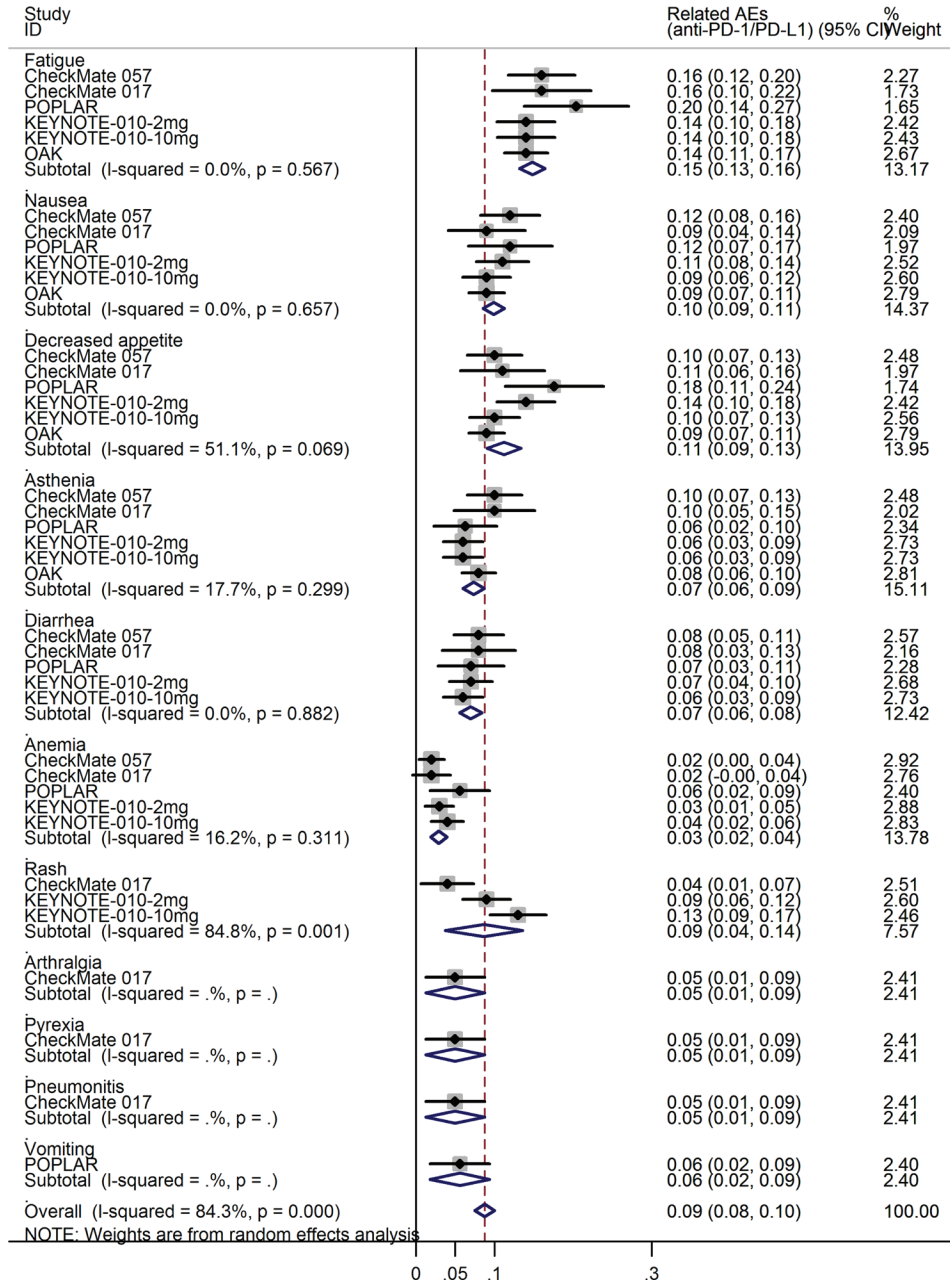

**Supplementary Figure 7: Pooled estimates of any-grade treatment-related adverse events rates for anti-PD-1/PD-L1 antibodies.**

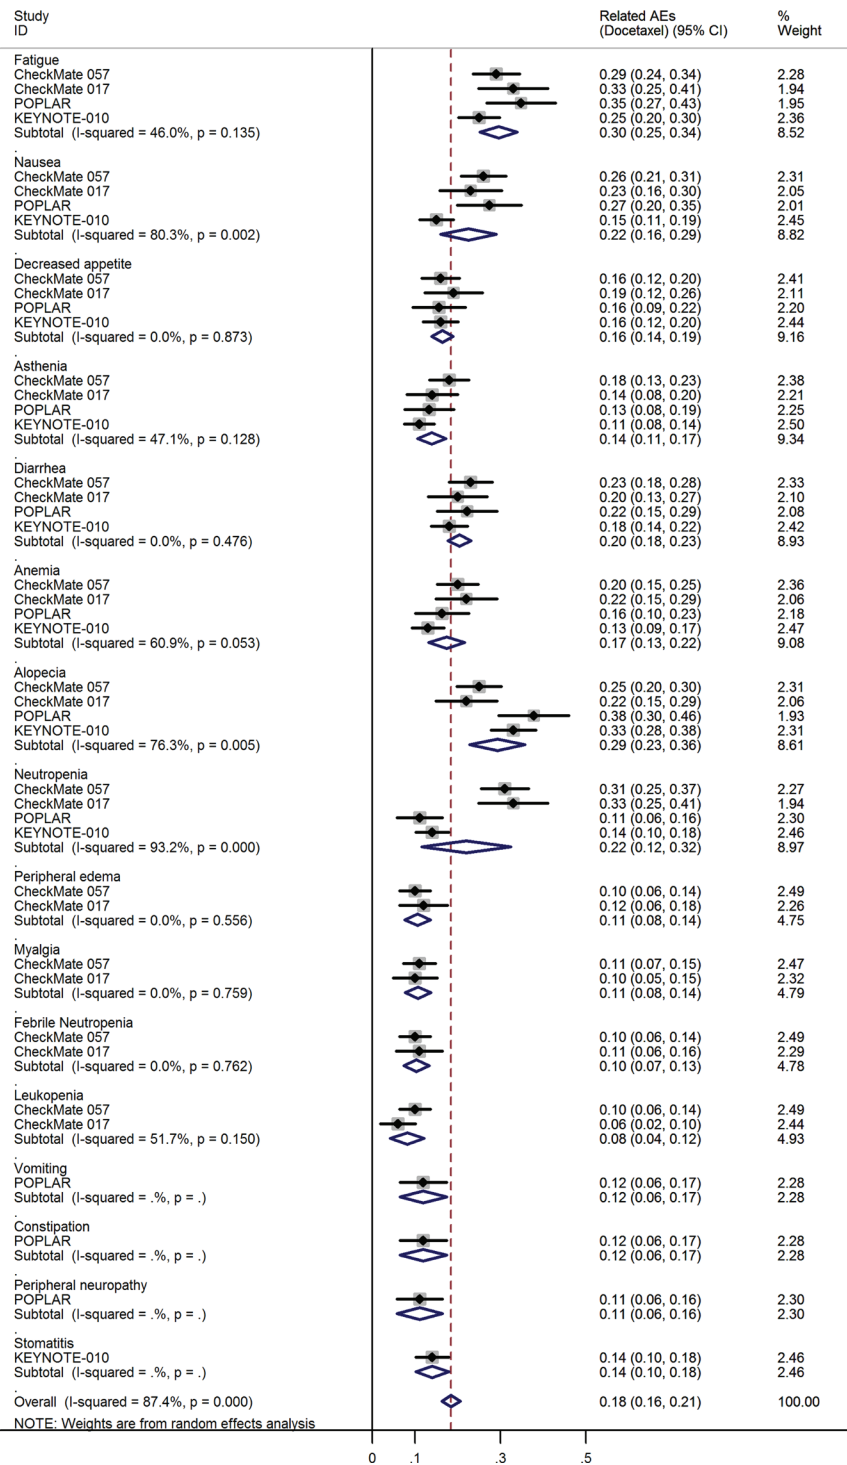

Supplementary Figure 8: Pooled estimates of any-grade treatment-related adverse events rates for docetaxel.

**Supplementary Table 1: Univariate meta-regression analysis for the potential variables between studies**

| <b>Covariates</b>        | <b>Coefficient</b> | <b>Standard error</b> | <b><i>t</i></b> | <b><i>p</i> value</b> | <b>95% Confidence interval</b> |         |
|--------------------------|--------------------|-----------------------|-----------------|-----------------------|--------------------------------|---------|
| Sample size              | -0.000148          | 0.0009                | -0.16           | 0.880                 | -0.0027                        | 0.00241 |
| Race                     | 0.491              | 0.507                 | 0.97            | 0.388                 | -0.916                         | 1.897   |
| Duration-Docetaxel       | -0.467             | 0.441                 | -1.06           | 0.349                 | -1.69                          | 0.758   |
| Duration-anti PD-1/PD-L1 | 0.688              | 0.550                 | 1.25            | 0.279                 | -0.839                         | 2.215   |
| PD-L1 expression         | 0.611              | 0.223                 | 2.73            | 0.052                 | -0.997                         | 1.231   |

**Supplementary Table 2: Grade 3–5 treatment-related adverse events**

| <b>Author and study</b>       | <b>Drug</b>                                       | <b>Treatment-related Grade 3 or 4 adverse events no. (%)</b> | <b>Treatment-related Grade 5 adverse events (Deaths) no. (%)</b> |
|-------------------------------|---------------------------------------------------|--------------------------------------------------------------|------------------------------------------------------------------|
| Borghaei [8]<br>CheckMate 057 | Nivolumab<br>(PD-1<br>antibody)                   | 30 (10)                                                      | 1 (0.4)                                                          |
|                               | Docetaxel                                         | 144 (54)                                                     | 1 (0.4)                                                          |
| Brahmer [9]<br>CheckMate 017  | Nivolumab<br>(PD-1<br>antibody)                   | 9 (7)                                                        | 0                                                                |
|                               | Docetaxel                                         | 71 (55)                                                      | 3 (2.3)                                                          |
| Fehrenbacher [10]<br>POPLAR   | Atezolizumab<br>(PD-L1<br>antibody)               | 16 (11)                                                      | 1 (0.7)                                                          |
|                               | Docetaxel                                         | 52 (39)                                                      | 3 (2.2)                                                          |
| Herbst [11]<br>KEYNOTE-010    | Pembrolizumab<br>(2 mg/kg)<br>(PD-1<br>antibody)  | 40 (12)                                                      | 3 (0.9)                                                          |
|                               | Pembrolizumab<br>(10 mg/kg)<br>(PD-1<br>antibody) | 52 (15)                                                      | 3 (0.9)                                                          |
|                               | Docetaxel                                         | 104 (34)                                                     | 5 (1.6)                                                          |
| Rittmeyer [12]<br>OAK         | Atezolizumab<br>(PD-L1<br>antibody)               | 90 (15)                                                      | 0                                                                |
|                               | Docetaxel                                         | 247 (43)                                                     | 1 (0.2)                                                          |
